# Supplementary material
Source: PubMed Central journal article supplement (PMC329232)

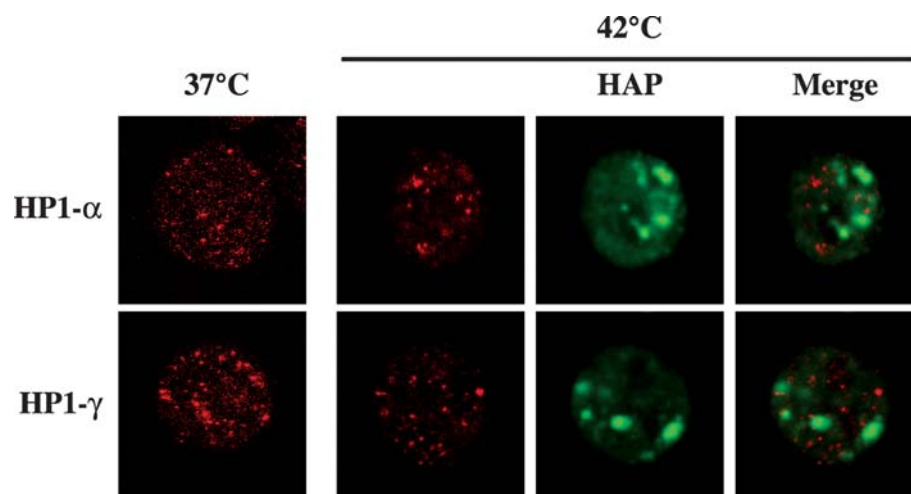

Supplement: mbc_15_2_543__1.pdf [file mbc_15_2_543__1.pdf]

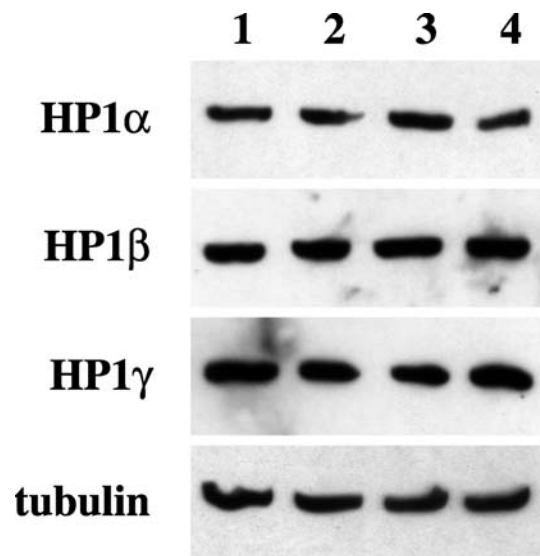

Supplement: mbc_15_2_543__2.pdf [file mbc_15_2_543__2.pdf]
